# Supplementary material for: Surface Modification of CaCO3 by Ultrasound-Assisted Titanate and Silane Coupling Agents
Source: MDPI journal article supplement (doi:10.3390/ma16103788), 2023-05-17
Supplement: s1 [file s1]

---

Supporting Information for

# **Surface Modification of CaCO<sub>3</sub> by Ultrasound-Assisted Titanate and Silane Coupling Agents**

Peng Cheng <sup>1,2,\*</sup>, Lei Yang <sup>2</sup>, Yuxiong Xie <sup>1</sup> and Yu Liu <sup>1</sup>

<sup>1</sup> School of Civil Engineering, Nanyang Institute of Technology, Nanyang  
473004, China

<sup>2</sup> Shaanxi Key Laboratory of Environmental Engineering, Xi'an University of  
Architecture and Technology, Xi'an 710055, China

\* Correspondence: [gps\\_pengcheng@126.com](mailto:gps_pengcheng@126.com)

**This file includes:**

**Equation S1 to S3**

**Table S1 to S3**

**Figure S1**

**Total pages: 4**

Taking the OAV, AG, and SV as the response values, the quadratic multinomial regression equations obtained by RSM test are shown as **Equation S1**, **Equation S2**, and **Equation S3**, respectively.

$$\text{OAV} = 0.289 - 0.153H_1 - 0.103H_2 - 0.006H_3 - 0.001H_1H_2 + 0.001H_1H_3 - 0.003H_2H_3 + 0.104H_1^2 + 0.088H_2^2 + 0.0004H_3^2 \quad (\text{S1})$$

$$\text{AG} = 40.18 - 4.22H_1 - 33.01H_2 + 14.55H_3 + 0.14H_1H_2 + 1.61H_1H_3 + 3.26H_2H_3 - 8.94H_1^2 + 0.81H_2^2 - 0.91H_3^2 \quad (\text{S2})$$

$$\text{SV} = 6.87 - 0.86H_1 - 2.50H_2 - 1.02H_3 + 0.09H_1H_2 - 0.03H_1H_3 + 0.07H_2H_3 + 0.77H_1^2 + 1.28H_2^2 + 0.05H_3^2 \quad (\text{S3})$$

where  $H_1$ ,  $H_2$  and  $H_3$  are the dosage of HY311 (given in wt% based on  $\text{CaCO}_3$ ), the dosage of KH550 (given in wt% based on  $\text{CaCO}_3$ ), and the ultrasonication time (min), respectively. The variance analysis of RSM results is shown in **Table S1**, **Table S2**, and **Table S3**, respectively.

**Table S1** Analysis of variance of regression model equation for OAV.

| Source      | Sum of squares | df | Mean square | F-Value | p-Value  |                 |
|-------------|----------------|----|-------------|---------|----------|-----------------|
| Model       | 0.0023         | 9  | 0.0003      | 686.84  | < 0.0001 | Significant     |
| $H_1$       | 3.65E-06       | 1  | 3.65E-06    | 9.87    | 0.0163   |                 |
| $H_2$       | 0.0001         | 1  | 0.0001      | 294.63  | < 0.0001 |                 |
| $H_3$       | 6.61E-07       | 1  | 6.61E-07    | 1.79    | 0.2226   |                 |
| $H_1H_2$    | 1.23E-07       | 1  | 1.23E-07    | 0.3318  | 0.5826   |                 |
| $H_1H_3$    | 2.72E-06       | 1  | 2.72E-06    | 7.37    | 0.03     |                 |
| $H_2H_3$    | 0              | 1  | 0           | 57.31   | 0.0001   |                 |
| $H_1^2$     | 0.0012         | 1  | 0.0012      | 3131.14 | < 0.0001 |                 |
| $H_2^2$     | 0.0008         | 1  | 0.0008      | 2265.63 | < 0.0001 |                 |
| $H_3^2$     | 9.41E-06       | 1  | 9.41E-06    | 25.49   | 0.0015   |                 |
| Residual    | 2.58E-06       | 7  | 3.69E-07    |         |          |                 |
| Lack of Fit | 1.39E-06       | 3  | 4.64E-07    | 1.56    | 0.3309   | Not Significant |
| Pure Error  | 1.19E-06       | 4  | 2.98E-07    |         |          |                 |
| Cor Total   | 0.0023         | 16 |             |         |          |                 |

**Table S2** Analysis of variance of regression model equation for AG.

| Source                        | Sum of squares | df | Mean square | F-Value | p-Value  |                 |
|-------------------------------|----------------|----|-------------|---------|----------|-----------------|
| Model                         | 102.16         | 9  | 11.35       | 57.38   | < 0.0001 | Significant     |
| H <sub>1</sub>                | 0.3872         | 1  | 0.3872      | 1.96    | 0.2045   |                 |
| H <sub>2</sub>                | 0.8450         | 1  | 0.8450      | 4.27    | 0.0776   |                 |
| H <sub>3</sub>                | 0.7080         | 1  | 0.7080      | 3.58    | 0.1004   |                 |
| H <sub>1</sub> H <sub>2</sub> | 0.0020         | 1  | 0.0020      | 0.0102  | 0.9223   |                 |
| H <sub>1</sub> H <sub>3</sub> | 6.63           | 1  | 6.63        | 33.52   | 0.0007   |                 |
| H <sub>2</sub> H <sub>3</sub> | 27.20          | 1  | 27.20       | 137.47  | < 0.0001 |                 |
| H <sub>1</sub> <sup>2</sup>   | 8.62           | 1  | 8.62        | 43.57   | 0.0003   |                 |
| H <sub>2</sub> <sup>2</sup>   | 0.0703         | 1  | 0.0703      | 0.3556  | 0.5698   |                 |
| H <sub>3</sub> <sup>2</sup>   | 55.20          | 1  | 55.20       | 279.02  | < 0.0001 |                 |
| Residual                      | 1.38           | 7  | 0.1978      |         |          |                 |
| Lack of Fit                   | 0.1751         | 3  | 0.0584      | 0.1930  | 0.8961   | Not Significant |
| Pure Error                    | 1.21           | 4  | 0.3024      |         |          |                 |
| Cor Total                     | 103.55         | 16 |             |         |          |                 |

**Table S3** Analysis of variance of regression model equation for SV.

| Source                        | Sum of squares | df | Mean square | F-Value | p-Value  |                 |
|-------------------------------|----------------|----|-------------|---------|----------|-----------------|
| Model                         | 0.4735         | 9  | 0.0526      | 104.46  | < 0.0001 | Significant     |
| H <sub>1</sub>                | 0.001          | 1  | 0.001       | 2.06    | 0.1948   |                 |
| H <sub>2</sub>                | 0.0032         | 1  | 0.0032      | 6.35    | 0.0398   |                 |
| H <sub>3</sub>                | 0.0001         | 1  | 0.0001      | 0.2385  | 0.6402   |                 |
| H <sub>1</sub> H <sub>2</sub> | 0.0009         | 1  | 0.0009      | 1.79    | 0.2231   |                 |
| H <sub>1</sub> H <sub>3</sub> | 0.0027         | 1  | 0.0027      | 5.27    | 0.0554   |                 |
| H <sub>2</sub> H <sub>3</sub> | 0.0121         | 1  | 0.0121      | 24.03   | 0.0017   |                 |
| H <sub>1</sub> <sup>2</sup>   | 0.0646         | 1  | 0.0646      | 128.3   | < 0.0001 |                 |
| H <sub>2</sub> <sup>2</sup>   | 0.1772         | 1  | 0.1772      | 351.79  | < 0.0001 |                 |
| H <sub>3</sub> <sup>2</sup>   | 0.1665         | 1  | 0.1665      | 330.68  | < 0.0001 |                 |
| Residual                      | 0.0035         | 7  | 0.0005      |         |          |                 |
| Lack of Fit                   | 0.0014         | 3  | 0.0005      | 0.8838  | 0.5213   | Not Significant |
| Pure Error                    | 0.0021         | 4  | 0.0005      |         |          |                 |
| Cor Total                     | 0.4770         | 16 |             |         |          |                 |

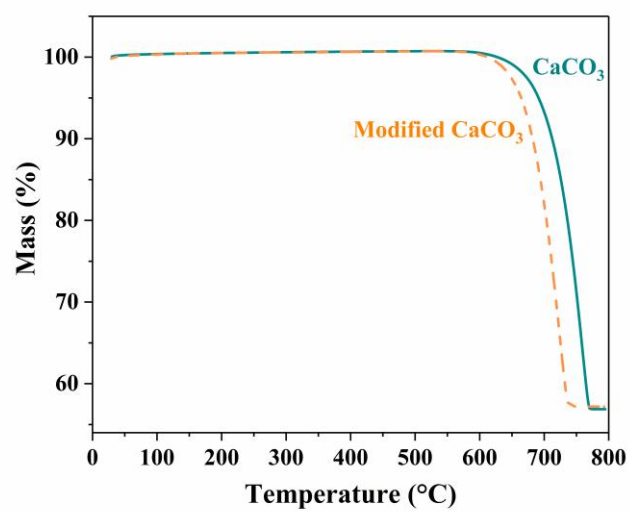

**Figure S1.** TG curves of  $\text{CaCO}_3$  before and after modification.
